# Supplementary material for: Isolation and Characterization of a Novel Cyanophage Encoding Multiple Auxiliary Metabolic Genes
Source: MDPI journal article supplement (doi:10.3390/v14050887), 2022-04-24
Supplement: s1 [file s1]

## Supplementary Materials

# Isolation and Characterization of a Novel Cyanophage Encoding Multiple Auxiliary Metabolic Genes

**Table S1.** Genome annotations of cyanophage S-SZBM1.

| Gene No. | Start | End  | aa length | Strand | Related phage or microbes        | Query cover | $e$ -value ( $\leq 10^{-5}$ ) | Percent identity | Accession      | Conserved domain Accession | $e$ -value ( $\leq 10^{-5}$ ) | Putative function    |
|----------|-------|------|-----------|--------|----------------------------------|-------------|-------------------------------|------------------|----------------|----------------------------|-------------------------------|----------------------|
| 1        | 69    | 269  | 66        | -      | Cyanophage P-RSM6                | 86%         | 2.00E-20                      | 73.68%           | YP_007675177.1 |                            |                               | Hypothetical protein |
| 2        | 266   | 433  | 55        | -      | Synechococcus phage S-WAM1       | 100%        | 8.00E-26                      | 80.00%           | YP_009325064.1 |                            |                               | Hypothetical protein |
| 3        | 426   | 557  | 43        | -      | n/a                              | n/a         | n/a                           | n/a              | n/a            |                            |                               | Hypothetical protein |
| 4        | 1028  | 1645 | 205       | -      | Synechococcus phage S-WAM1       | 99%         | 5.00E-108                     | 71.43%           | YP_009325061.1 |                            |                               | Hypothetical protein |
| 5        | 1653  | 2084 | 143       | -      | Synechococcus phage S-RIM8 A.HR1 | 97%         | 4.00E-42                      | 52.11%           | YP_007518150.1 |                            |                               | Hypothetical protein |
| 6        | 2087  | 2251 | 54        | -      | n/a                              | n/a         | n/a                           | n/a              | n/a            |                            |                               | Hypothetical protein |
| 7        | 2254  | 2469 | 71        | -      | Synechococcus phage S-WAM1       | 100%        | 6.00E-30                      | 77.46%           | YP_009325054.1 |                            |                               | Hypothetical protein |
| 8        | 2492  | 2800 | 102       | -      | Synechococcus phage syn9         | 95%         | 3.00E-16                      | 44.00%           | YP_717757.1    |                            |                               | Hypothetical protein |
| 9        | 2942  | 3118 | 58        | -      | n/a                              | n/a         | n/a                           | n/a              | n/a            |                            |                               | Hypothetical protein |
| 10       | 3120  | 3281 | 53        | -      | Synechococcus phage S-RIM8 A.HR1 | 100%        | 9.00E-27                      | 88.68%           | YP_007518154.1 |                            |                               | Hypothetical protein |
| 11       | 3295  | 3561 | 88        | -      | n/a                              | n/a         | n/a                           | n/a              | n/a            |                            |                               | Hypothetical protein |
| 12       | 3585  | 3773 | 62        | -      | Synechococcus phage S-RIM8 A.HR1 | 100%        | 2.00E-23                      | 66.13%           | YP_007518141.1 |                            |                               | Hypothetical protein |
| 13       | 3851  | 4126 | 91        | -      | Alphaproteobacteria bacterium    | 80%         | 1.00E-04                      | 33.75%           | NDB82294.1     |                            |                               | Hypothetical protein |

|    |       |       |     |   |                                      |      |           |        |                |           |          |  |  |                               |
|----|-------|-------|-----|---|--------------------------------------|------|-----------|--------|----------------|-----------|----------|--|--|-------------------------------|
| 14 | 4192  | 4383  | 63  | - | Synechococcus phage syn9             | 79%  | 6.00E-17  | 66.00% | YP_717747.1    |           |          |  |  | Hypothetical protein          |
| 15 | 4383  | 4646  | 87  | - | Synechococcus phage S-RIM8           | 98%  | 1.00E-39  | 73.26% | YP_009782974.1 |           |          |  |  | Hypothetical protein          |
| 16 | 4726  | 4911  | 61  | - | n/a                                  | n/a  | n/a       | n/a    | n/a            |           |          |  |  | Hypothetical protein          |
| 17 | 4988  | 5416  | 142 | - | Bacterium                            | 99%  | 2.00E-62  | 70.42% | NBX51468.1     |           |          |  |  | Hypothetical protein          |
| 18 | 5598  | 5780  | 60  | - | n/a                                  | n/a  | n/a       | n/a    | n/a            |           |          |  |  | Hypothetical protein          |
| 19 | 5773  | 5943  | 56  | - | n/a                                  | n/a  | n/a       | n/a    | n/a            |           |          |  |  | Hypothetical protein          |
| 20 | 5943  | 6212  | 89  | - | Uncultured Mediterranean phage uvMED | 71%  | 2.00E-15  | 56.92% | BAR40008.1     |           |          |  |  | Hypothetical protein          |
| 21 | 6184  | 6330  | 48  | - | n/a                                  | n/a  | n/a       | n/a    | n/a            |           |          |  |  | Hypothetical protein          |
| 22 | 6419  | 6583  | 54  | - | Synechococcus phage S-CBM2           | 90%  | 1.00E-10  | 53.06% | AFK66434.1     |           |          |  |  | Hypothetical protein          |
| 23 | 6583  | 6831  | 82  | - | Synechococcus phage S-CBM2           | 100% | 2.00E-49  | 91.46% | AFK66448.1     |           |          |  |  | Hypothetical protein          |
| 24 | 7405  | 8574  | 389 | - | Cyanophage P-RSM6                    | 98%  | 9.00E-177 | 63.61% | YP_007675203.1 |           |          |  |  | Hypothetical protein          |
| 25 | 8655  | 8915  | 86  | - | Cyanophage P-RSM6                    | 70%  | 4.00E-09  | 42.62% | YP_007675204.1 |           |          |  |  | Hypothetical protein          |
| 26 | 8912  | 9106  | 64  | - | Synechococcus phage S-WAM1           | 98%  | 6.00E-23  | 61.90% | YP_009325044.1 |           |          |  |  | Hypothetical protein          |
| 27 | 9116  | 9244  | 42  | - | Bacterium                            | 100% | 6.00E-11  | 64.29% | NDG31949.1     |           |          |  |  | Hypothetical protein          |
| 28 | 9241  | 9327  | 28  | - | n/a                                  | n/a  | n/a       | n/a    | n/a            |           |          |  |  | Hypothetical protein          |
| 29 | 9327  | 9629  | 100 | - | Bacterium                            | 100% | 1.00E-57  | 84.00% | NBX50893.1     | cd22268   | 2.05E-44 |  |  | Rare lipoprotein A, RlpA      |
| 30 | 9666  | 10202 | 178 | - | Cyanophage P-RSM6                    | 90%  | 1.00E-74  | 65.64% | YP_007675205.1 |           |          |  |  | Hypothetical protein          |
| 31 | 10220 | 10897 | 225 | - | Euryarchaeota archaeon               | 98%  | 2.00E-133 | 77.83% | MBM4242076.1   | pfam13529 | 9.62E-13 |  |  | C39 family peptidase          |
| 32 | 10912 | 11418 | 168 | - | Synechococcus phage S-WAM1           | 98%  | 2.00E-66  | 60.24% | YP_009325040.1 | pfam13759 | 1.58E-10 |  |  | Putative 2OG-Fe(II) oxygenase |
| 33 | 11512 | 12756 | 414 | - | Synechococcus phage S-WAM1           | 100% | 0.00E+00  | 80.43% | YP_009325039.1 | COG1061   | 1.32E-25 |  |  | Helicase                      |
| 34 | 12840 | 13163 | 107 | - | Chitinophagia bacterium              | 98%  | 5.00E-06  | 27.52% | NDF98420.1     |           |          |  |  | Hypothetical protein          |
| 35 | 13182 | 13493 | 103 | - | n/a                                  | n/a  | n/a       | n/a    | n/a            |           |          |  |  | Hypothetical protein          |
| 36 | 13486 | 13596 | 36  | - | n/a                                  | n/a  | n/a       | n/a    | n/a            |           |          |  |  | Hypothetical protein          |

|    |           |           |      |   |                                    |      |           |        |                |           |          |  |                                           |
|----|-----------|-----------|------|---|------------------------------------|------|-----------|--------|----------------|-----------|----------|--|-------------------------------------------|
| 37 | 1359<br>8 | 1375<br>9 | 53   | - | Synechococcus phage S-H25          | 94%  | 2.00E-12  | 64.00% | QIN97213.1     |           |          |  | Hypothetical protein                      |
| 38 | 1375<br>6 | 1408<br>8 | 110  | - | Synechococcus phage S-WAM1         | 100% | 3.00E-41  | 59.09% | YP_009325030.1 |           |          |  | Hypothetical protein                      |
| 39 | 1408<br>5 | 1421<br>9 | 44   | - | Deltaproteobacteria bacterium      | 100% | 2.00E-07  | 50.00% | MBT89952.1     |           |          |  | Hypothetical protein                      |
| 40 | 1423<br>3 | 1440<br>3 | 56   | - | Flavobacteriales bacterium TMED113 | 94%  | 7.00E-10  | 50.94% | OUV52660.1     |           |          |  | Hypothetical protein                      |
| 41 | 1442<br>8 | 1479<br>3 | 121  | - | Deltaproteobacteria bacterium      | 99%  | 2.00E-47  | 65.83% | MBT89954.1     |           |          |  | Hypothetical protein                      |
| 42 | 1493<br>9 | 1564<br>3 | 234  | - | Synechococcus phage S-WAM1         | 100% | 8.00E-153 | 85.47% | YP_009325027.1 | pfam08007 | 1.17E-12 |  | Cupin superfamily protein                 |
| 43 | 1564<br>0 | 1631<br>1 | 223  | - | Synechococcus phage S-WAM1         | 83%  | 2.00E-82  | 63.54% | YP_009325026.1 | pfam13759 | 3.69E-12 |  | Putative 2OG-Fe(II) oxygenase             |
| 44 | 1629<br>2 | 1697<br>5 | 227  | - | Cyanophage P-RSM6                  | 98%  | 7.00E-127 | 76.34% | YP_007675218.1 | pfam13759 | 1.05E-29 |  | Putative 2OG-Fe(II) oxygenase             |
| 45 | 1697<br>5 | 1744<br>5 | 156  | - | Synechococcus phage S-WAM1         | 85%  | 5.00E-62  | 67.16% | YP_009325024.1 |           |          |  | Hypothetical protein                      |
| 46 | 1744<br>8 | 1903<br>4 | 528  | - | Synechococcus phage S-WAM1         | 100% | 0.00E+00  | 77.65% | YP_009325023.1 | pfam04820 | 7.56E-97 |  | Tryptophan halogenase, PrnA               |
| 47 | 1904<br>1 | 1958<br>9 | 182  | - | Deltaproteobacteria bacterium      | 91%  | 4.00E-72  | 63.69% | MBT89960.1     |           |          |  | Hypothetical protein                      |
| 48 | 1959<br>6 | 2039<br>6 | 266  | - | Rhodobacteraceae bacterium         | 100% | 4.00E-145 | 86.09% | MBT25064.1     |           |          |  | Hypothetical protein                      |
| 49 | 2042<br>9 | 2123<br>2 | 267  | - | Deltaproteobacteria bacterium      | 100% | 2.00E-150 | 86.14% | MBT89962.1     |           |          |  | Hypothetical protein                      |
| 50 | 2128<br>1 | 2215<br>6 | 291  | - | Myoviridae sp.                     | 94%  | 4.00E-30  | 44.83% | QMP83641.1     |           |          |  | Hypothetical protein                      |
| 51 | 2216<br>6 | 2302<br>9 | 287  | - | Cyanophage P-RSM6                  | 98%  | 2.00E-136 | 71.83% | YP_007675227.1 |           |          |  | Hypothetical protein                      |
| 52 | 2304<br>9 | 2662<br>7 | 1192 | - | Cyanophage P-RSM6                  | 100% | 0.00E+00  | 90.60% | YP_007675228.1 |           |          |  | Structural protein                        |
| 53 | 2667<br>2 | 2887<br>6 | 734  | - | Synechococcus phage S-WAM1         | 100% | 0.00E+00  | 65.31% | YP_009325015.1 |           |          |  | Structural protein                        |
| 54 | 2888<br>4 | 3021<br>8 | 444  | - | Synechococcus phage S-WAM1         | 100% | 0.00E+00  | 75.90% | YP_009325014.1 |           |          |  | YadA domain-containing structural protein |
| 55 | 3025<br>1 | 3047<br>5 | 74   | - | Synechococcus phage S-CBM2         | 89%  | 6.00E-17  | 54.55% | AFK66352.1     |           |          |  | Hypothetical protein                      |
| 56 | 3049<br>2 | 3063<br>5 | 47   | - | Alphaproteobacteria bacterium      | 87%  | 2.00E-16  | 85.37% | NDB86287.1     |           |          |  | Hypothetical protein                      |
| 57 | 3069<br>4 | 3119<br>4 | 166  | - | Synechococcus phage S-E7           | 100% | 4.00E-28  | 38.95% | AYR02149.1     |           |          |  | DNA endonuclease V                        |
| 58 | 3193<br>0 | 3212<br>1 | 63   | - | Synechococcus phage S-WAM1         | 100% | 8.00E-24  | 66.67% | YP_009325011.1 |           |          |  | Hypothetical protein                      |

|    |       |       |     |   |                               |      |           |        |                |            |           |                                               |
|----|-------|-------|-----|---|-------------------------------|------|-----------|--------|----------------|------------|-----------|-----------------------------------------------|
| 59 | 32257 | 32541 | 94  | - | Cyanophage P-RSM6             | 97%  | 5.00E-28  | 53.76% | YP_007675234.1 |            |           | Hypothetical protein                          |
| 60 | 32546 | 32734 | 62  | - | Cyanophage P-RSM1             | 100% | 2.00E-14  | 50.00% | YP_007877620.1 |            |           | Hypothetical protein                          |
| 61 | 32740 | 35295 | 851 | - | Cyanophage P-RSM6             | 99%  | 0         | 59.91% | YP_007675236.1 | PHA02596   | 3.30E-11  | Baseplate hub subunit and tail lysozyme       |
| 62 | 35295 | 35783 | 162 | - | Cyanophage P-RSM6             | 97%  | 3.00E-72  | 63.29% | YP_007675237.1 | cd16338    | 6.32E-11  | CpeT-like protein, CpeT                       |
| 63 | 35767 | 36372 | 201 | - | Synechococcus phage S-WAM1    | 68%  | 3.00E-70  | 71.01% | YP_009325005.1 | pfam13640  | 2.09E-11  | 2OG-Fe(II) oxygenase                          |
| 64 | 36436 | 36648 | 70  | - | Synechococcus phage S-H25     | 100% | 7.00E-24  | 62.86% | QIN97220.1     | smart01093 | 1.07E-12  | CP12 carbon metabolic regulator, CP12         |
| 65 | 36673 | 38283 | 536 | - | Deltaproteobacteria bacterium | 98%  | 0.00E+00  | 52.82% | MBT89976.1     |            |           | Hypothetical protein                          |
| 66 | 38283 | 40625 | 780 | - | Cyanophage P-RSM6             | 99%  | 0.00E+00  | 40.92% | YP_007675241.1 | cd00736    | 2.27E-06  | Lambda lysozyme                               |
| 67 | 40630 | 43311 | 893 | - | Cyanophage P-RSM6             | 63%  | 7.00E-80  | 34.05% | YP_007675242.1 |            |           | Hypothetical protein                          |
| 68 | 43311 | 43502 | 63  | - | Cyanophage P-RSM6             | 100% | 4.00E-21  | 65.08% | YP_007675243.1 | PHA02078   | 2.06E-13  | Baseplate hub assembly catalyst               |
| 69 | 43508 | 44209 | 233 | - | Rhodobacteraceae bacterium    | 100% | 2.00E-133 | 78.11% | MBT25751.1     | pfam12322  | 3.77E-14  | Baseplate protein                             |
| 70 | 44235 | 44984 | 249 | - | Synechococcus phage S-WAM1    | 85%  | 1.00E-74  | 53.27% | YP_009324999.1 |            |           | Hypothetical protein                          |
| 71 | 44981 | 45451 | 156 | - | Synechococcus phage ACG-2014i | 98%  | 2.00E-13  | 26.52% | YP_009140793.1 | PHA02577   | 1.75E-08  | DNA end protector protein                     |
| 72 | 45448 | 45882 | 144 | - | Synechococcus phage S-WAM1    | 100% | 2.00E-89  | 84.03% | YP_009324997.1 | PHA02552   | 1.75E-73  | Head completion protein                       |
| 73 | 45881 | 46894 | 337 | + | Synechococcus phage S-WAM1    | 94%  | 2.00E-123 | 54.63% | YP_009324996.1 |            |           | Baseplate tail tube cap                       |
| 74 | 46894 | 47772 | 292 | + | Cyanophage P-RSM6             | 96%  | 3.00E-117 | 55.67% | YP_007675249.1 | PHA02578   | 4.04E-14  | Baseplate wedge component                     |
| 75 | 48079 | 49020 | 313 | - | Synechococcus phage S-WAM1    | 100% | 0.00E+00  | 82.43% | YP_009324991.1 | PHA02550   | 3.69E-126 | Single stranded DNA-binding protein           |
| 76 | 49125 | 49487 | 120 | - | Synechococcus phage S-WAM1    | 97%  | 6.00E-56  | 72.88% | YP_009325210.1 | pfam08855  | 2.31E-07  | DUF1825 domain-containing protein             |
| 77 | 49484 | 49729 | 81  | - | Cyanophage P-TIM40            | 97%  | 4.00E-33  | 70.89% | YP_009188078.1 | pfam16805  | 3.00E-20  | Late promoter transcription accessory protein |
| 78 | 49726 | 50370 | 214 | - | Nonlabens xiamenensis         | 97%  | 1.00E-85  | 62.68% | WP_206052197.1 | pfam12705  | 4.49E-08  | PD-(D/E)XK nuclease                           |
| 79 | 50409 | 51161 | 250 | - | Synechococcus phage S-WAM1    | 100% | 3.00E-168 | 88.89% | YP_009325206.1 | pfam02562  | 9.38E-36  | PhoH                                          |
| 80 | 51163 | 51393 | 76  | - | Synechococcus phage S-WAM1    | 100% | 6.00E-37  | 80.26% | YP_009325205.1 |            |           | Hypothetical protein                          |

|     |           |           |      |   |                             |      |           |        |                    |              |           |  |                                   |
|-----|-----------|-----------|------|---|-----------------------------|------|-----------|--------|--------------------|--------------|-----------|--|-----------------------------------|
| 81  | 5139<br>5 | 5157<br>4 | 59   | - | Synechococcus phage S-SCSM1 | 100% | 2.00E-32  | 94.92% | QFG06454.1         |              |           |  | Hypothetical protein              |
| 82  | 5157<br>4 | 5225<br>7 | 227  | - | Synechococcus phage S-CBM2  | 100% | 9.00E-145 | 83.05% | AFK66378.1         | PRK008<br>47 | 1.13E-81  |  | Thymidylate synthase              |
| 83  | 5225<br>4 | 5250<br>8 | 84   | - | Cyanophage P-RSM6           | 67%  | 1.00E-14  | 57.63% | YP_0076750<br>39.1 |              |           |  | Hypothetical protein              |
| 84  | 5250<br>5 | 5277<br>4 | 89   | - | bacterium                   | 100% | 6.00E-16  | 46.67% | NBV27774.1         |              |           |  | Hypothetical protein              |
| 85  | 5277<br>5 | 5320<br>6 | 143  | - | Synechococcus phage S-WAM1  | 100% | 7.00E-79  | 79.02% | YP_0093252<br>00.1 |              |           |  | Hypothetical protein              |
| 86  | 5320<br>8 | 5408<br>6 | 292  | - | Synechococcus phage S-WAM1  | 100% | 3.00E-159 | 75.00% | YP_0093251<br>99.1 | PHA025<br>67 | 1.38E-106 |  | Ribonuclease H                    |
| 87  | 5409<br>2 | 5433<br>1 | 79   | - | Euryarchaeota archaeon      | 97%  | 1.00E-30  | 70.51% | MBG46620.<br>1     |              |           |  | Hypothetical protein              |
| 88  | 5436<br>3 | 5473<br>4 | 123  | - | Synechococcus phage S-WAM1  | 100% | 7.00E-65  | 71.54% | YP_0093251<br>97.1 |              |           |  | Hypothetical protein              |
| 89  | 5473<br>4 | 5498<br>5 | 83   | - | Synechococcus phage S-WAM1  | 100% | 6.00E-43  | 78.31% | YP_0093251<br>96.1 | cd03029      | 7.98E-16  |  | Glutaredoxin, NrdC                |
| 90  | 5505<br>0 | 5541<br>8 | 122  | - | Synechococcus phage S-SCSM1 | 100% | 4.00E-16  | 39.84% | QFG06402.1         |              |           |  | DUF680 domain-containing protein  |
| 91  | 5556<br>4 | 5587<br>8 | 104  | - | Cyanophage P-RSM6           | 96%  | 2.00E-34  | 63.73% | YP_0076750<br>47.1 |              |           |  | Hypothetical protein              |
| 92  | 5587<br>8 | 5917<br>4 | 1098 | - | Cyanophage P-RSM6           | 98%  | 0.00E+00  | 45.44% | YP_0076750<br>48.1 |              |           |  | Hypothetical protein              |
| 93  | 5923<br>6 | 5936<br>1 | 41   | - | n/a                         | n/a  | n/a       | n/a    | n/a                |              |           |  | Hypothetical protein              |
| 94  | 5935<br>8 | 5989<br>7 | 179  | - | Synechococcus phage S-PM2   | 93%  | 6.00E-61  | 54.14% | YP_195042.<br>2    |              |           |  | Hypothetical protein              |
| 95  | 5989<br>4 | 6007<br>6 | 60   | - | Synechococcus phage S-PM2   | 100% | 2.00E-32  | 88.33% | CFW42160.<br>1     |              |           |  | Hypothetical protein              |
| 96  | 6006<br>9 | 6035<br>9 | 96   | - | Synechococcus phage S-H9-2  | 50%  | 5.00E-18  | 77.08% | QPB08477.1         |              |           |  | Hypothetical protein              |
| 97  | 6035<br>6 | 6054<br>1 | 61   | - | bacterium                   | 100% | 2.00E-17  | 57.38% | NDG30122.<br>1     |              |           |  | Hypothetical protein              |
| 98  | 6054<br>4 | 6066<br>6 | 40   | - | n/a                         | n/a  | n/a       | n/a    | n/a                |              |           |  | Hypothetical protein              |
| 99  | 6066<br>3 | 6086<br>9 | 68   | - | Synechococcus phage S-PM2   | 97%  | 1.00E-34  | 83.33% | YP_195055.<br>1    |              |           |  | Hypothetical protein              |
| 100 | 6086<br>6 | 6105<br>1 | 61   | - | Synechococcus phage S-PM2   | 100% | 4.00E-35  | 95.08% | YP_195053.<br>1    |              |           |  | Hypothetical protein              |
| 101 | 6104<br>8 | 6120<br>9 | 53   | - | Synechococcus phage S-PM2   | 100% | 7.00E-29  | 94.34% | YP_195052.<br>1    |              |           |  | Hypothetical protein              |
| 102 | 6128<br>2 | 6166<br>2 | 126  | - | Synechococcus phage S-PM2   | 100% | 1.00E-71  | 81.75% | YP_195048.<br>1    | COG44<br>53  | 4.91E-07  |  | DUF1778 domain-containing protein |

|     |       |       |     |   |                                      |      |           |        |                |           |          |  |                                                 |
|-----|-------|-------|-----|---|--------------------------------------|------|-----------|--------|----------------|-----------|----------|--|-------------------------------------------------|
| 103 | 61746 | 62138 | 130 | - | Alphaproteobacteria bacterium        | 93%  | 2.00E-65  | 77.87% | NDB85592.1     |           |          |  | Hypothetical protein                            |
| 104 | 62135 | 62542 | 135 | - | Cylindrospermopsis curvispora        | 89%  | 2.00E-58  | 73.44% | WP_187707554.1 |           |          |  | Membrane protease subunit                       |
| 105 | 62539 | 62661 | 40  | - | Synechococcus phage S-PM2            | 100% | 4.00E-17  | 82.50% | YP_195045.1    |           |          |  | Hypothetical protein                            |
| 106 | 62661 | 62966 | 101 | - | Synechococcus phage S-PM2            | 94%  | 4.00E-47  | 74.74% | YP_195044.1    |           |          |  | Hypothetical protein                            |
| 107 | 62953 | 63180 | 75  | - | Synechococcus phage S-CBS4           | 81%  | 1.00E-20  | 59.02% | YP_005098305.1 |           |          |  | Rnf-Nqr, nitrogen fixation protein-like protein |
| 108 | 63253 | 64332 | 359 | - | Synechococcus phage S-PM2            | 100% | 0.00E+00  | 93.04% | YP_195211.1    | TIGR01151 | 0.00E+00 |  | Photosystem II D1 protein, PsbA                 |
| 109 | 64462 | 64737 | 91  | - | n/a                                  | n/a  | n/a       | n/a    | n/a            |           |          |  | Hypothetical protein                            |
| 110 | 64727 | 64900 | 57  | - | Synechococcus phage S-WAM1           | 89%  | 2.00E-09  | 49.02% | YP_009325186.1 |           |          |  | Hypothetical protein                            |
| 111 | 65166 | 65690 | 174 | - | Synechococcus phage S-H9-1           | 98%  | 3.00E-91  | 73.14% | QPB08144.1     | COG0678   | 1.16E-81 |  | Peroxiredoxin, Prdx                             |
| 112 | 65674 | 65919 | 81  | - | Synechococcus phage S-SRM01          | 83%  | 3.00E-24  | 66.18% | QPX48290.1     |           |          |  | Hypothetical protein                            |
| 113 | 65916 | 66206 | 96  | - | Synechococcus phage S-CBM2           | 97%  | 2.00E-55  | 88.30% | AFK66341.1     | CHL00134  | 2.73E-49 |  | Ferredoxin I, PetF                              |
| 114 | 66292 | 66486 | 64  | - | Alphaproteobacteria bacterium        | 100% | 3.00E-32  | 82.81% | NDB87304.1     |           |          |  | High light inducible protein, Hli               |
| 115 | 66537 | 66806 | 89  | - | Uncultured Mediterranean phage uvMED | 84%  | 2.00E-11  | 41.33% | BAR31741.1     |           |          |  | Hypothetical protein                            |
| 116 | 67001 | 67237 | 78  | - | Caulobacteraceae bacterium           | 92%  | 9.00E-39  | 83.33% | NBW15424.1     |           |          |  | Hypothetical protein                            |
| 117 | 67270 | 67890 | 206 | - | Synechococcus phage S-WAM1           | 100% | 3.00E-136 | 87.86% | YP_009325178.1 | pfam13640 | 4.23E-08 |  | 2OG-Fe(II) oxygenase superfamily                |
| 118 | 67887 | 68096 | 69  | - | Synechococcus phage S-WAM1           | 100% | 2.00E-35  | 81.16% | YP_009325177.1 | PHA02360  | 3.86E-14 |  | Hypothetical protein                            |
| 119 | 68301 | 68819 | 172 | - | Synechococcus phage S-WAM1           | 100% | 4.00E-87  | 71.51% | YP_009325176.1 | pfam13640 | 1.59E-15 |  | 2OG-Fe(II) oxygenase superfamily                |
| 120 | 68806 | 68955 | 49  | - | n/a                                  | n/a  | n/a       | n/a    | n/a            |           |          |  | Hypothetical protein                            |
| 121 | 69001 | 69573 | 190 | - | Cyanophage P-RSM6                    | 98%  | 6.00E-94  | 68.98% | YP_007675057.1 | pfam13759 | 3.92E-15 |  | 2OG-Fe(II) oxygenase superfamily                |
| 122 | 69545 | 69784 | 79  | - | Euryarchaeota archaeon               | 89%  | 2.00E-41  | 91.55% | MBU37915.1     |           |          |  | Hypothetical protein                            |
| 123 | 69858 | 70079 | 73  | - | Synechococcus phage S-WAM1           | 68%  | 2.00E-17  | 84.00% | YP_009325172.1 |           |          |  | Hypothetical protein                            |
| 124 | 70069 | 70236 | 55  | - | Synechococcus phage S-WAM1           | 100% | 4.00E-19  | 70.91% | YP_009325171.1 |           |          |  | Hypothetical protein                            |

|     |       |       |     |   |                            |      |           |        |                |            |           |                                                                 |
|-----|-------|-------|-----|---|----------------------------|------|-----------|--------|----------------|------------|-----------|-----------------------------------------------------------------|
| 125 | 70238 | 70891 | 217 | - | Synechococcus phage Syn19  | 99%  | 3.00E-102 | 65.28% | YP_004324023.1 | PRK01362   | 2.69E-94  | Transaldolase-like protein, fructose-6-phosphate aldolase, TalC |
| 126 | 71049 | 71183 | 44  | - | n/a                        | n/a  | n/a       | n/a    | n/a            |            |           | Hypothetical protein                                            |
| 127 | 71223 | 71381 | 52  | - | Synechococcus phage S-H9-2 | 100% | 8.00E-07  | 43.40% | QPB08418.1     |            |           | Hypothetical protein                                            |
| 128 | 71534 | 71968 | 144 | - | Synechococcus phage S-WAM1 | 97%  | 1.00E-29  | 48.23% | YP_009325167.1 |            |           | Hypothetical protein                                            |
| 129 | 71931 | 73067 | 378 | - | Synechococcus phage S-WAM1 | 100% | 0.00E+00  | 83.07% | YP_009325166.1 | PRK09101   | 0.00E+00  | NrdB                                                            |
| 130 | 73058 | 73225 | 55  | - | Synechococcus phage S-RSM4 | 85%  | 5.00E-10  | 55.32% | YP_003097416.1 |            |           | Hypothetical protein                                            |
| 131 | 73218 | 75527 | 769 | - | Synechococcus phage S-WAM1 | 99%  | 0.00E+00  | 80.81% | YP_009325165.1 | PHA02572   | 0.00E+00  | NrdA                                                            |
| 132 | 75524 | 76354 | 276 | - | Cyanophage P-RSM6          | 100% | 3.00E-154 | 72.83% | YP_007675068.1 | PHA02540   | 2.13E-122 | DNA primase                                                     |
| 133 | 76503 | 76937 | 144 | - | Synechococcus phage S-WAM1 | 98%  | 2.00E-50  | 57.34% | YP_009325163.1 |            |           | Hypothetical protein                                            |
| 134 | 76939 | 77310 | 123 | - | Synechococcus phage S-WAM1 | 98%  | 7.00E-51  | 68.03% | YP_009325162.1 |            |           | Hypothetical protein                                            |
| 135 | 77307 | 77678 | 123 | - | Euryarchaeota archaeon     | 100% | 6.00E-64  | 77.24% | MBU38018.1     | PHA02335   | 1.94E-46  | Hypothetical protein                                            |
| 136 | 77694 | 78293 | 199 | - | Synechococcus phage S-H35  | 97%  | 1.00E-68  | 60.30% | ARW56996.1     |            |           | Virion structural protein                                       |
| 137 | 78380 | 78574 | 64  | - | Synechococcus phage S-H35  | 100% | 1.00E-30  | 82.81% | ARW56997.1     | PHA02334   | 5.15E-24  | Hypothetical protein                                            |
| 138 | 78608 | 78991 | 127 | - | Synechococcus phage S-WAM1 | 99%  | 3.00E-30  | 60.94% | YP_009325157.1 |            |           | Hypothetical protein                                            |
| 139 | 78988 | 80361 | 457 | - | Synechococcus phage S-WAM1 | 57%  | 3.00E-60  | 64.81% | YP_009325156.1 |            |           | Hypothetical protein                                            |
| 140 | 80389 | 81477 | 362 | - | Synechococcus phage S-WAM1 | 100% | 0.00E+00  | 76.99% | YP_009325155.1 |            |           | Cytidylyltransferase                                            |
| 141 | 81477 | 82670 | 397 | - | Synechococcus phage S-WAM1 | 100% | 0.00E+00  | 69.77% | YP_009325154.1 |            |           | Hypothetical protein                                            |
| 142 | 82670 | 84007 | 445 | - | Synechococcus phage S-WAM1 | 100% | 3.00E-86  | 34.41% | YP_009325153.1 |            |           | Hypothetical protein                                            |
| 143 | 84035 | 84262 | 75  | - | Hyphomonas sp. TMED31      | 100% | 8.00E-27  | 64.00% | OUX85947.1     |            |           | Hypothetical protein                                            |
| 144 | 84262 | 84912 | 216 | - | Euryarchaeota archaeon     | 83%  | 2.00E-92  | 71.11% | MBJ29706.1     | cd11541    | 2.00E-19  | Nucleoside triphosphate pyrophosphohydrolase, MazG              |
| 145 | 84909 | 86291 | 460 | - | Synechococcus phage S-WAM1 | 100% | 0.00E+00  | 82.61% | YP_009325149.1 | PHA02542   | 0.00E+00  | DNA primase/helicase                                            |
| 146 | 86291 | 86854 | 187 | - | Cyanophage P-RSM6          | 100% | 3.00E-77  | 59.57% | YP_007675085.1 | smart00702 | 2.70E-11  | 2OG-Fe(II) oxygenase superfamily                                |

|     |            |            |     |   |                             |      |               |        |                    |               |               |                                          |
|-----|------------|------------|-----|---|-----------------------------|------|---------------|--------|--------------------|---------------|---------------|------------------------------------------|
| 147 | 8684<br>4  | 8785<br>7  | 337 | - | Euryarchaeota archaeon      | 99%  | 0.00E+<br>00  | 85.42% | MBJ29703.1         | COG04<br>68   | 5.65E-<br>24  | Recombinase RecA                         |
| 148 | 8785<br>4  | 9034<br>3  | 829 | - | Synechococcus phage S-WAM1  | 95%  | 0.00E+<br>00  | 83.60% | YP_0093251<br>46.1 | PHA025<br>28  | 0.00E<br>+00  | DNA polymerase                           |
| 149 | 9034<br>3  | 9058<br>5  | 80  | - | Cyanophage P-RSM6           | 96%  | 7.00E-<br>29  | 64.94% | YP_0076750<br>88.1 |               |               | Hypothetical protein                     |
| 150 | 9056<br>3  | 9088<br>9  | 108 | - | Euryarchaeota archaeon      | 94%  | 4.00E-<br>27  | 51.96% | MBJ29700.1         |               |               | Hypothetical protein                     |
| 151 | 9086<br>1  | 9110<br>3  | 80  | - | Cyanophage P-RSM6           | 98%  | 4.00E-<br>33  | 68.35% | YP_0076750<br>90.1 |               |               | Hypothetical protein                     |
| 152 | 9116<br>7  | 9161<br>3  | 148 | - | Synechococcus phage S-RIM2  | 99%  | 6.00E-<br>95  | 87.76% | AOO00033.<br>1     | cd06470       | 1.80E-<br>28  | Heat shock protein, Hsp                  |
| 153 | 9169<br>7  | 9313<br>6  | 479 | - | Cyanophage P-RSM6           | 99%  | 0.00E+<br>00  | 65.70% | YP_0076751<br>01.1 | COG21<br>92   | 2.46E-<br>80  | Carbamoyltransferase                     |
| 154 | 9316<br>0  | 9357<br>6  | 138 | - | Synechococcus phage S-WAM1  | 100% | 1.00E-<br>88  | 90.58% | YP_0093251<br>33.1 | PHA025<br>43  | 1.61E-<br>74  | Translation repressor protein            |
| 155 | 9357<br>3  | 9396<br>8  | 131 | - | Cyanophage P-RSM6           | 96%  | 3.00E-<br>62  | 69.05% | YP_0076751<br>03.1 | PHA025<br>93  | 2.99E-<br>13  | Clamp loader subunit                     |
| 156 | 9395<br>2  | 9480<br>0  | 282 | - | Synechococcus phage S-WAM1  | 100% | 2.00E-<br>158 | 74.22% | YP_0093251<br>31.1 | COG03<br>38   | 1.00E-<br>38  | Cytosine-specific DNA methyltransferase  |
| 157 | 9480<br>3  | 9494<br>3  | 46  | - | Synechococcus phage S-CAM22 | 100% | 2.00E-<br>18  | 78.26% | YP_0093210<br>42.1 |               |               | Hypothetical protein                     |
| 158 | 9494<br>0  | 9550<br>3  | 187 | - | Synechococcus phage S-WAM1  | 99%  | 6.00E-<br>111 | 82.26% | YP_0093251<br>30.1 | pfam13<br>759 | 2.25E-<br>13  | Putative 2OG-Fe(II) oxygenase            |
| 159 | 9556<br>0  | 9650<br>4  | 314 | - | Cyanophage P-RSM6           | 99%  | 0.00E+<br>00  | 84.62% | YP_0076751<br>06.1 | PHA025<br>44  | 8.63E-<br>166 | Sliding clamp loader                     |
| 160 | 9658<br>9  | 9732<br>6  | 245 | - | Cyanophage P-RSM6           | 95%  | 6.00E-<br>105 | 65.11% | YP_0076751<br>09.1 | PHA025<br>45  | 3.06E-<br>51  | Sliding clamp                            |
| 161 | 9732<br>6  | 9762<br>8  | 100 | - | Euryarchaeota archaeo       | 92%  | 5.00E-<br>38  | 70.65% | MBU38050.<br>1     | pfam11<br>753 | 8.31E-<br>10  | DUF3310 domain-containing protein        |
| 162 | 9768<br>7  | 9877<br>8  | 363 | - | Synechococcus phage S-B43   | 97%  | 0.00E+<br>00  | 75.07% | QDH50584.<br>1     | COG07<br>14   | 4.41E-<br>19  | Putative cobalt chelatase subunit, CobS  |
| 163 | 9885<br>6  | 1010<br>12 | 718 | - | Synechococcus phage S-WAM1  | 99%  | 0.00E+<br>00  | 54.68% | YP_0093251<br>23.1 |               |               | Peptidase                                |
| 164 | 1011<br>81 | 1014<br>17 | 78  | - | Prokaryotic dsDNA virus sp. | 100% | 2.00E-<br>36  | 71.79% | QDP50089.1         |               |               | Hypothetical protein                     |
| 165 | 1015<br>30 | 1018<br>65 | 111 | - | Synechococcus phage S-WAM1  | 100% | 9.00E-<br>53  | 69.37% | YP_0093251<br>22.1 | PRK027<br>70  | 4.18E-<br>46  | S-adenosylmethionine decarboxylase, SpeD |
| 166 | 1018<br>67 | 1035<br>82 | 571 | - | Cyanophage P-RSM6           | 99%  | 0.00E+<br>00  | 69.37% | YP_0076751<br>15.1 | PHA025<br>62  | 0.00E<br>+00  | Recombination endonuclease subunit       |
| 167 | 1035<br>75 | 1038<br>35 | 86  | - | Nonlabens xiamenensis       | 96%  | 2.00E-<br>27  | 61.45% | WP_206052<br>188.1 |               |               | Hypothetical protein                     |
| 168 | 1038<br>35 | 1048<br>63 | 342 | - | Synechococcus phage S-WAM1  | 100% | 0.00E+<br>00  | 73.98% | YP_0093251<br>18.1 | PHA025<br>46  | 4.02E-<br>133 | Recombination-related endonuclease       |



|     |        |        |     |   |                                      |      |           |        |                |           |           |                                                    |
|-----|--------|--------|-----|---|--------------------------------------|------|-----------|--------|----------------|-----------|-----------|----------------------------------------------------|
| 169 | 104878 | 105099 | 73  | - | Synechococcus phage S-B05]           | 100% | 3.00E-16  | 47.95% | QCW22939.1     |           |           | Hypothetical protein                               |
| 170 | 105096 | 105575 | 159 | - | Synechococcus phage S-WAM1           | 98%  | 9.00E-99  | 86.62% | YP_009325116.1 | PHA02547  | 4.28E-64  | RNA polymerase sigma factor for late transcription |
| 171 | 105717 | 106160 | 147 | - | Nonlabens xiamenensis                | 97%  | 2.00E-68  | 64.58% | YP_007675120.1 | pfam16243 | 1.10E-23  | Methylamine utilization protein                    |
| 172 | 106153 | 107616 | 487 | - | Synechococcus phage S-WAM1           | 100% | 0.00E+00  | 85.83% | YP_009325114.1 | PHA02558  | 0.00E+00  | UvsW helicase                                      |
| 173 | 107616 | 108038 | 140 | - | Synechococcus phage S-WAM1           | 100% | 9.00E-86  | 85.71% | YP_009325113.1 | pfam11056 | 5.61E-28  | UvsY protein                                       |
| 174 | 108035 | 108610 | 191 | - | Synechococcus phage S-WAM1           | 98%  | 1.00E-87  | 68.09% | YP_009325112.1 | PHA02576  | 5.02E-14  | Tail completion protein                            |
| 175 | 108628 | 108762 | 44  | - | Synechococcus phage S-CAM3           | 93%  | 9.00E-15  | 75.61% | YP_009321457.1 |           |           | Hypothetical protein                               |
| 176 | 109002 | 110360 | 452 | - | Cyanophage P-RSM6                    | 100% | 0.00E+00  | 87.83% | YP_007675133.1 | PHA02541  | 0.00E+00  | Major capsid protein                               |
| 177 | 110413 | 111432 | 339 | - | Synechococcus phage S-WAM1           | 100% | 2.00E-174 | 78.26% | YP_009325108.1 | PHA02557  | 3.15E-64  | Prohead core protein                               |
| 178 | 111489 | 112136 | 215 | - | Synechococcus phage S-WAM1           | 100% | 2.00E-132 | 83.26% | YP_009325107.1 | PHA00911  | 5.02E-94  | Prohead core scaffolding protein and protease      |
| 179 | 112111 | 112356 | 81  | - | Synechococcus phage S-WAM1           | 100% | 4.00E-20  | 55.56% | YP_009325106.1 |           |           | Hypothetical protein                               |
| 180 | 112382 | 113989 | 535 | - | Synechococcus phage S-WAM1           | 100% | 0.00E+00  | 90.11% | YP_009325105.1 | PHA02531  | 0.00E+00  | Portal vertex of the head                          |
| 181 | 114030 | 114704 | 224 | - | Uncultured Mediterranean phage uvMED | 94%  | 2.00E-90  | 61.99% | BAR35460.1     | PHA02551  | 4.98E-63  | Tail tube protein                                  |
| 182 | 114746 | 117520 | 924 | - | Cyanophage P-RSM6                    | 99%  | 0.00E+00  | 72.82% | YP_007675139.1 | PHA02539  | 1.62E-178 | Tail sheath protein                                |
| 183 | 117610 | 117852 | 80  | - | Synechococcus phage S-SRM01          | 98%  | 8.00E-44  | 86.08% | QPX48241.1     |           |           | Hypothetical protein                               |
| 184 | 117861 | 118082 | 73  | - | uncultured Mediterranean phage uvMED | 95%  | 1.00E-14  | 52.86% | BAR29000.1     |           |           | T4-like Endonuclease VII                           |
| 185 | 118082 | 119734 | 550 | - | Synechococcus phage S-WAM1           | 99%  | 0.00E+00  | 88.95% | YP_009325102.1 | PHA02533  | 0.00E+00  | Terminase large subunit                            |
| 186 | 119727 | 119942 | 71  | - | Synechococcus phage S-H35            | 98%  | 7.00E-38  | 87.14% | ARW57058.1     |           |           | Hypothetical protein                               |
| 187 | 120369 | 120500 | 43  | - | Synechococcus phage S-H9-1           | 100% | 1.00E-15  | 76.74% | QPB08238.1     |           |           | Hypothetical protein                               |
| 188 | 120500 | 120736 | 78  | - | Synechococcus phage S-RIM8           | 100% | 8.00E-42  | 83.33% | AOO10471.1     | PHA02325  | 5.53E-38  | Hypothetical protein                               |
| 189 | 120720 | 120944 | 74  | - | Synechococcus phage S-WAM2           | 82%  | 1.00E-24  | 70.49% | YP_009324278.1 |           |           | Hypothetical protein                               |
| 190 | 121033 | 122307 | 424 | - | Synechococcus phage S-RIM2           | 100% | 0.00E+00  | 86.79% | AON98689.1     |           |           | Virion structural protein                          |

|     |            |            |      |   |                                      |      |           |        |                |           |           |  |  |                                               |
|-----|------------|------------|------|---|--------------------------------------|------|-----------|--------|----------------|-----------|-----------|--|--|-----------------------------------------------|
| 191 | 1223<br>11 | 1226<br>28 | 105  | - | Synechococcus phage S-H25            | 96%  | 1.00E-36  | 66.02% | QIN97139.1     |           |           |  |  | Hypothetical protein                          |
| 192 | 1226<br>28 | 1231<br>25 | 165  | - | Synechococcus phage ACG-2014f        | 49%  | 2.00E-40  | 88.89% | AIX16650.1     |           |           |  |  | Hypothetical protein                          |
| 193 | 1231<br>22 | 1232<br>59 | 45   | - | Synechococcus phage S-WAM1           | 68%  | 4.00E-07  | 64.52% | YP_009325089.1 |           |           |  |  | Hypothetical protein                          |
| 194 | 1232<br>52 | 1253<br>75 | 707  | - | Synechococcus phage S-WAM1           | 62%  | 4.00E-160 | 59.49% | YP_009325088.1 |           |           |  |  | Hypothetical protein                          |
| 195 | 1253<br>77 | 1256<br>40 | 87   | - | Synechococcus phage S-H25            | 100% | 1.00E-26  | 64.37% | QIN97141.1     |           |           |  |  | Hypothetical protein                          |
| 196 | 1256<br>84 | 1261<br>09 | 141  | - | Synechococcus phage S-WAM1           | 100% | 2.00E-76  | 82.98% | YP_009325086.1 | pfam11053 | 8.80E-06  |  |  | Terminase small subunit                       |
| 197 | 1260<br>99 | 1268<br>96 | 265  | - | Nonlabens xiamenensis                | 100% | 4.00E-154 | 80.75% | WP_124981717.1 | PHA02556  | 5.03E-95  |  |  | Tail sheath stabilizer and completion protein |
| 198 | 1268<br>96 | 1277<br>71 | 291  | - | Synechococcus phage S-WAM1           | 100% | 6.00E-173 | 80.07% | YP_009325084.1 | PHA02555  | 7.46E-81  |  |  | Neck protein                                  |
| 199 | 1277<br>73 | 1285<br>67 | 264  | - | Nonlabens xiamenensis                | 100% | 1.00E-158 | 78.20% | WP_124981715.1 | PHA02554  | 6.07E-68  |  |  | Neck protein                                  |
| 200 | 1285<br>74 | 1347<br>95 | 2073 | - | Uncultured Mediterranean phage uvMED | 99%  | 0.00E+00  | 67.88% | BAR31833.1     |           |           |  |  | Structural protein                            |
| 201 | 1348<br>84 | 1350<br>99 | 71   | - | Synechococcus phage S-WAM1           | 81%  | 3.00E-23  | 77.59% | YP_009325081.1 |           |           |  |  | Hypothetical protein                          |
| 202 | 1350<br>99 | 1353<br>47 | 82   | - | Uncultured Mediterranean phage uvMED | 89%  | 7.00E-19  | 56.00% | BAR31831.1     |           |           |  |  | Hypothetical protein                          |
| 203 | 1353<br>47 | 1426<br>87 | 2446 | - | Synechococcus phage S-WAM1           | 100% | 0.00E+00  | 68.60% | YP_009325079.1 | pfam16075 | 2.44E-26  |  |  | Baseplate wedge tail fiber connector          |
| 204 | 1426<br>89 | 1442<br>24 | 511  | - | Cyanophage P-RSM6                    | 100% | 0.00E+00  | 91.59% | YP_007675161.1 | PHA02580  | 1.38E-09  |  |  | Baseplate wedge                               |
| 205 | 1442<br>59 | 1461<br>06 | 615  | - | Synechococcus phage S-H38            | 90%  | 1.00E-160 | 48.06% | QPB07967.1     |           |           |  |  | Baseplate wedge initiator                     |
| 206 | 1461<br>10 | 1476<br>06 | 498  | - | Synechococcus phage S-WAM1           | 100% | 0.00E+00  | 70.48% | YP_009325076.1 | PHA02582  | 2.14E-07  |  |  | Baseplate wedge protein                       |
| 207 | 1476<br>33 | 1492<br>31 | 532  | - | Synechococcus phage S-WAM1           | 100% | 0.00E+00  | 70.97% | YP_009325075.1 | pfam14240 | 8.53E-38  |  |  | Structural protein                            |
| 208 | 1492<br>48 | 1691<br>07 | 6619 | - | Synechococcus phage S-WAM1           | 100% | 0.00E+00  | 72.64% | YP_009325074.1 | pfam14240 | 1.62E-33  |  |  | Baseplate wedge initiator                     |
| 209 | 1691<br>15 | 1711<br>90 | 691  | - | Cyanophage P-RSM6                    | 100% | 0.00E+00  | 78.08% | YP_007675166.1 | PHA02553  | 1.63E-165 |  |  | Baseplate wedge subunit                       |
| 210 | 1711<br>92 | 1716<br>05 | 137  | - | Synechococcus phage S-WAM1           | 85%  | 1.00E-50  | 65.81% | YP_009325072.1 | PHA00415  | 4.92E-40  |  |  | Baseplate wedge subunit                       |
| 211 | 1716<br>05 | 1717<br>93 | 62   | - | Synechococcus phage S-IOM18          | 98%  | 5.00E-26  | 82.26% | YP_008126388.1 |           |           |  |  | Hypothetical protein                          |
| 212 | 1719<br>06 | 1721<br>03 | 65   | - | Synechococcus phage S-SRM01          | 80%  | 1.00E-16  | 63.46% | QPX48204.1     |           |           |  |  | Hypothetical protein                          |

|     |        |        |      |   |                            |     |          |        |                |          |          |                      |
|-----|--------|--------|------|---|----------------------------|-----|----------|--------|----------------|----------|----------|----------------------|
| 213 | 172103 | 172252 | 49   | - | Synechococcus phage S-WAM1 | 97% | 8.00E-13 | 66.67% | YP_009325071.1 | PHA02324 | 3.25E-06 | Hypothetical protein |
| 214 | 172521 | 172718 | 65   | + | n/a                        | n/a | n/a      | n/a    | n/a            |          |          | Hypothetical protein |
| 215 | 172804 | 176607 | 1267 | - | Cyanophage P-RSM6          | 98% | 0.00E+00 | 51.26% | YP_007675170.1 |          |          | Hypothetical protein |
| 216 | 176607 | 176849 | 80   | - | Synechococcus phage S-WAM1 | 96% | 5.00E-35 | 76.62% | YP_009325069.1 |          |          | Hypothetical protein |
| 217 | 176910 | 177086 | 58   | - | Synechococcus phage S-WAM1 | 91% | 5.00E-13 | 56.60% | YP_009325067.1 |          |          | Hypothetical protein |
| 218 | 177109 | 177645 | 178  | - | Rhodobacteraceae bacterium | 89% | 4.00E-59 | 57.14% | MBT26522.1     |          |          | Hypothetical protein |

**Table S2.** T4-like core genes in cyanophage S-SZBM1 genome. + means gene is in conserved domain and – means gene is not conserved.

| Gene Description                                                               | Gene No. in S-SZBM1 | The size of the gene (bp) | Conserved domain ( <i>e</i> -value $\leq 10^{-5}$ ) |
|--------------------------------------------------------------------------------|---------------------|---------------------------|-----------------------------------------------------|
| gp3 head-proximal tip of tail tube tail completion + sheath stabilizer protein | 174                 | 576                       | +                                                   |
| gp4 head completion protein                                                    | 72                  | 435                       | +                                                   |
| gp5 baseplate hub + tail lysozyme                                              | 61                  | 2556                      | +                                                   |
| gp6 baseplate wedge                                                            | 209                 | 2076                      | +                                                   |
| gp8 baseplate wedge                                                            | 204                 | 1536                      | +                                                   |
| gp13 neck protein                                                              | 199                 | 795                       | +                                                   |
| gp14 neck protein                                                              | 198                 | 876                       | +                                                   |
| gp15 proximal tail sheath stabilization                                        | 197                 | 798                       | +                                                   |
| gp16 terminase DNA packaging enzyme,small subunit                              | 196                 | 426                       | +                                                   |
| gp17 terminase DNA packaging enzyme,large subunit                              | 185                 | 1653                      | +                                                   |
| gp18 tail sheath monomer                                                       | 182                 | 2775                      | +                                                   |
| gp19 tail tube monomer                                                         | 181                 | 675                       | +                                                   |
| gp20 portal vertex protein of head                                             | 180                 | 1608                      | +                                                   |
| gp21 prohead core scaffold and protease                                        | 178                 | 648                       | +                                                   |
| gp22 scaffoldprohead core protein                                              | 177                 | 1020                      | +                                                   |
| gp23 precursor of major head subunit                                           | 176                 | 1359                      | +                                                   |
| gp25 base plate wedge subunit                                                  | 210                 | 414                       | +                                                   |
| gp26 baseplate hub subunit                                                     | 69                  | 702                       | +                                                   |
| gp32 ssDNA binding protein                                                     | 75                  | 942                       | +                                                   |
| gp33 late promoter transcription factor                                        | 77                  | 246                       | +                                                   |
| gp41 DNA primase-helicase                                                      | 145                 | 1383                      | +                                                   |
| gp43 DNA polymerase                                                            | 148                 | 2490                      | +                                                   |
| gp44 clamp loader subunit                                                      | 159                 | 945                       | +                                                   |
| gp45 sliding clamp DNA polymerase accessory protein                            | 160                 | 738                       | +                                                   |

|                                             |     |      |   |
|---------------------------------------------|-----|------|---|
| gp46 recombination endonuclease subunit     | 166 | 1716 | + |
| gp47 recombination endonuclease subunit     | 168 | 1029 | + |
| gp48 baseplate tail tube cap                | 73  | 1014 | - |
| gp53 base plate wedge component             | 74  | 879  | + |
| gp55 Sigma factor for late transcription    | 170 | 480  | + |
| gp61 DNA primase subunit                    | 132 | 831  | + |
| gp62 clamp loader subunit                   | 155 | 396  | + |
| DexA exonuclease A                          | 78  | 645  | + |
| NrdA ribonucleotide reductase A subunit     | 131 | 2310 | + |
| NrdB ribonucleotide reductase B subunit     | 129 | 1137 | + |
| NrdC Aerobic thioredoxin                    | 89  | 252  | + |
| RegA translational repressor of early genes | 154 | 417  | + |
| Td thymidilate synthase                     | 82  | 684  | + |
| UvsW RNA-DNA + DNA-DNA helicase             | 172 | 1464 | + |
| PsbA photosystem II D1 protein              | 108 | 1080 | + |
| MazG pyrophosphatase                        | 144 | 651  | + |
| PhoH P-starvation inducible protein         | 79  | 753  | + |
| Hsp20 small heat shock protein              | 152 | 447  | + |
| Hli03 high-light inducible protein          | 114 | 195  | - |
| CobS porphyrin biosynthetic protein         | 162 | 1092 | + |
| Virion structural protein                   | 65  | 1611 | - |
| Hyp. with DUF1825 domain                    | 76  | 363  | + |
| Hyp. with carboxypeptidase domain           | 163 | 2157 | - |
| Hyp. with CTP transerese domain             | 140 | 1089 | - |
| Hyp. with Methylamine utilization domain    | 171 | 444  | + |
| Hyp. with Phytanoyl-CoA-dioxygenase domain  | 32  | 507  | + |
| Hypothetical protein T4-GC#443              | 87  | 240  | - |

|                                                |     |       |   |
|------------------------------------------------|-----|-------|---|
| Hypothetical protein T4-GC#176                 | 150 | 327   | - |
| Hypothetical protein T4-GC#201                 | 133 | 435   | - |
| Hypothetical protein T4-GC#313                 | 85  | 432   | - |
| Hypothetical protein T4-GC#321                 | 80  | 231   | - |
| Hypothetical protein T4-GC#49                  | 164 | 237   | - |
| Hypothetical protein T4-GC#71                  | 141 | 1194  | - |
| Hypothetical protein T4-GC#112                 | 202 | 249   | - |
| Hypothetical protein T4-GC#142                 | 167 | 261   | - |
| Hypothetical protein T4-GC#152                 | 161 | 303   | + |
| Hypothetical protein T4-GC#250                 | 116 | 237   | - |
| Hypothetical protein T4-GC#198                 | 135 | 372   | - |
| Hypothetical protein T4-GC#43                  | 208 | 19860 | + |
| dCMP deaminase                                 | -   | -     | - |
| Dda DNA helicase                               | -   | -     | - |
| DsbA dsDNA binding protein, late transcription | -   | -     | - |
| gp1 dNMP kinase                                | -   | -     | - |
| gp7 baseplate wedge initiator                  | -   | -     | - |
| gp9 baseplate wedge tail fiber connector       | 206 | 1497  | + |
| gp10 baseplate wedge subunit and tail pin      | 206 | 1497  | + |
| gp11 base plate wedge component                | -   | -     | - |
| gp12 short tail fiber                          | -   | -     | - |
| gp24 precursor of head vertex subunit          | 176 | 1359  | + |
| gp30 DNA ligase                                | -   | -     | - |
| gp31 head assembly cochaperone with GroEL      | -   | -     | - |
| gp34 long tail fiber, proximal subunit         | -   | -     | - |
| gp49 recombination endonuclease VII            | -   | -     | - |
| gp52 DNA topoisomerase subunit                 | -   | -     | - |

---

|                                                    |    |     |   |
|----------------------------------------------------|----|-----|---|
| gp54 baseplate tail tube initiator                 | -  | -   | - |
| gp59 loader of gp41 DNA helicase                   | -  | -   | - |
| gp60+39 DNA topoisomerase subunit                  | -  | -   | - |
| Hypothetical-Protein T4-GC#1491                    | -  | -   | - |
| Hypothetical with 5' RNA ligase family domain      | -  | -   | - |
| Hypothetical with DUF1768 domain                   | -  | -   | - |
| NrdC.11 hypothetical protein                       | -  | -   | - |
| NrdD anaerobic NTP reductase large subunit         | -  | -   | - |
| NrdH glutaredoxin                                  | -  | -   | - |
| PseT polynucleotide 5'-kinase and 3'-phosphatase   | -  | -   | - |
| RIIA-RIIB membrane-associated                      | -  | -   | - |
| RNaseH ribonuclease                                | 86 | 879 | + |
| RnlA RNA ligase                                    | -  | -   | - |
| Tk thymidine kinase                                | -  | -   | - |
| Tk.4 hypothetical protein                          | -  | -   | - |
| Vs.1 hypothetical with transglycosylase SLT domain | -  | -   | - |
| Wac fibrin neck whiskers                           | -  | -   | - |

---

**Table S3.** tRNA genes predicted in the genome of cyanophage S-SZBM1.

| tRNA no. | Begin | End   | tRNA type | Anti codon | Inf Score | Sequence                                                                    |
|----------|-------|-------|-----------|------------|-----------|-----------------------------------------------------------------------------|
| 1        | 68288 | 68215 | Arg       | TCT        | 74.00     | GTCTCAGTAGCTCAGTTGGATAGAGCATCTGCCTTCTAAGCAGTTGGTCGGGGGTTTCGAGTCCCTCCTGAGACG |
| 2        | 68211 | 68140 | Val       | TAC        | 75.70     | GGGAGATTAGCTCAGCGGTAGAGCAATTGCCTTACAAGCAATGGGTCACTGGTTCGATCCCAGTATCTCCCA    |
| 3        | 31939 | 31866 | Thr       | TGT        | 73.00     | GCCTGAGTAGCTCAGCTGGATAGAGCAACGGTTTTGTAAACCGTAGGTCGTCGGTTCGAGTCGACCTTAGGCT   |
| 4        | 31761 | 31688 | Pro       | TGG        | 73.10     | CGAAGCGTAGCGCAGTTTGGTAGCGCACTGCTTTTGGGAAGCAGGGGTCGTAGGTTCGATTCTACCGTTTCGA   |
| 5        | 31405 | 31333 | Ala       | TGC        | 66.70     | GGGGAATTAGCTCATTTGGTAGAGCGCCTGCTTTGCACGCAGGAGGTAAGGGGTTTCGACTCCCCTATTCTCCA  |
| 6        | 31284 | 31213 | Asn       | GTT        | 71.30     | TCCTGCTTAGCTCAGCGGTAGAGCGAACGACTGTTAATCGTTTGGTCCCTGGTTCGATCCCAGGAGCAGGAG    |



**Table S4.** Homologs of cyanophage S-SZBM1 predicted in the non-redundant database base on the complete nucleotide sequence.

| Scientific Name                      | Max Score | Total Score | Query Cover | e-value | Identity | Accession   |
|--------------------------------------|-----------|-------------|-------------|---------|----------|-------------|
| <i>Synechococcus</i> phage S-WAM1    | 3659      | 35918       | 38.00%      | 0       | 78.95%   | KU686210.1  |
| <i>Prochlorococcus</i> phage P-RSM6  | 2686      | 10318       | 12.00%      | 0       | 78.60%   | HQ634193.1  |
| <i>Prochlorococcus</i> phage P-TIM40 | 1666      | 4410        | 6.00%       | 0       | 74.58%   | KP211958.1  |
| <i>Synechococcus</i> phage S-H25     | 1369      | 5728        | 5.00%       | 0       | 80.72%   | MT162468.1  |
| <i>Synechococcus</i> phage S-H38     | 1336      | 4575        | 3.00%       | 0       | 85.49%   | MW117965.1  |
| <i>Synechococcus</i> phage S-RIM2    | 1280      | 4463        | 3.00%       | 0       | 79.85%   | KX349234.1  |
| <i>Synechococcus</i> phage S-RIM12   | 1245      | 3388        | 3.00%       | 0       | 80.85%   | KX349307.1  |
| <i>Synechococcus</i> phage S-T4      | 1221      | 2325        | 2.00%       | 0       | 79.28%   | NC_048049.1 |
| <i>Synechococcus</i> phage S-ShM2    | 1194      | 2030        | 2.00%       | 0       | 76.90%   | GU071096.1  |
| <i>Synechococcus</i> phage S-RIM14   | 1194      | 2030        | 2.00%       | 0       | 76.87%   | KX349304.1  |
| <i>Synechococcus</i> phage S-SSM2    | 1188      | 2125        | 2.00%       | 0       | 76.85%   | JF974292.1  |
| <i>Synechococcus</i> virus S-PRM1    | 1157      | 2851        | 2.00%       | 0       | 78.54%   | NC_055761.1 |
| <i>Synechococcus</i> phage S-PM2     | 1110      | 4179        | 3.00%       | 0       | 84.92%   | AJ630128.1  |
| <i>Prochlorococcus</i> phage Syn33   | 1134      | 3277        | 3.00%       | 0       | 79.67%   | GU071108.1  |
